# Supplementary material for: Biological activities of Ficus carica latex for potential therapeutics in Human Papillomavirus (HPV) related cervical cancers
Source: PubMed Central journal article supplement (PMC6355798; doi:10.1038/s41598-018-37665-6), 2019-01-31
Supplement: 41598_2018_37665_MOESM1_ESM.pdf [file 41598_2018_37665_MOESM1_ESM.pdf]

## Supporting information (S)

### Biological activities of *Ficus carica* latex for potential therapeutics in Human Papillomavirus (HPV) related cervical cancers

Arshia Ghanbari <sup>1</sup>, Adam Le Gresley <sup>2</sup>, Declan Naughton <sup>2</sup>, Nikolai Kuhnert <sup>3</sup>, Diana Sirbu <sup>3</sup>, G. Hossein Ashrafi <sup>1\*</sup>

<sup>1</sup> Kingston University London, Cancer theme, School of Life Science, Pharmacy and Chemistry, SEC Faculty, Kingston upon Thames, KT1 2EE, London, UK

<sup>2</sup> Kingston University London, School of Life Science, Pharmacy and Chemistry, SEC Faculty, Kingston upon Thames, KT1 2EE, London, UK

<sup>3</sup> Department of Life Sciences & Chemistry Faculty of Health, Jacobs University Bremen, Campusring 8, 28759 Bremen, Germany

\* Corresponding Author: [H.ashrafi@kingston.ac.uk](mailto:H.ashrafi@kingston.ac.uk)

## Supporting information 1 (S1)

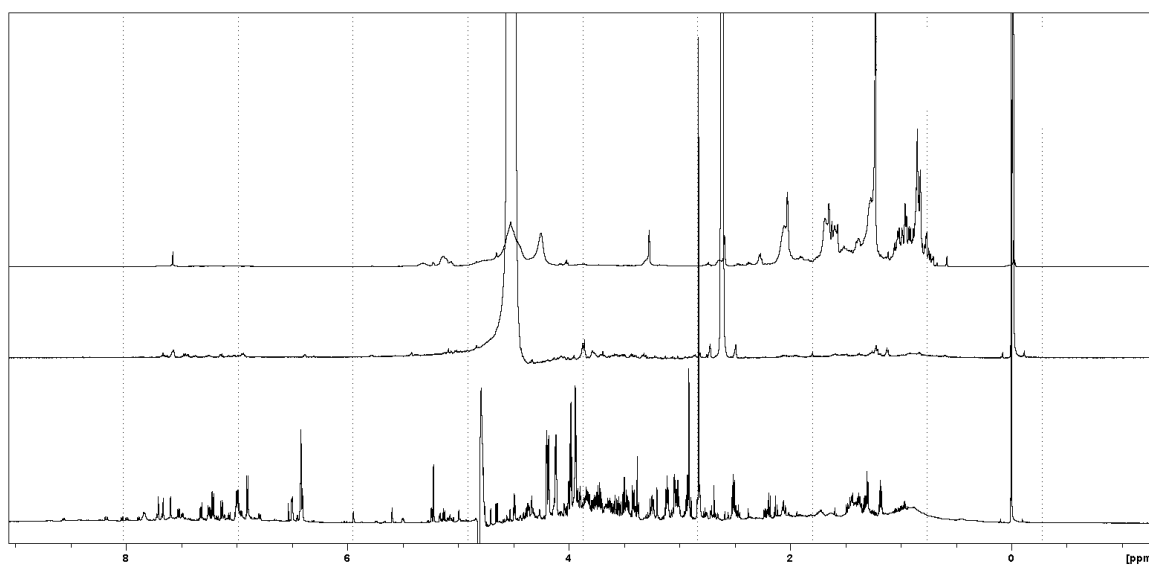

S1  $^1\text{H}$  NMR Spectra in  $\text{D}_2\text{O}/\text{H}_2\text{O}$  90:10% of Fig latex extracts. Top – Fig Latex Gum, Middle, Fig Latex Powder, Bottom, Fig Latex Supernatant.

## Supporting information 2 (S2)

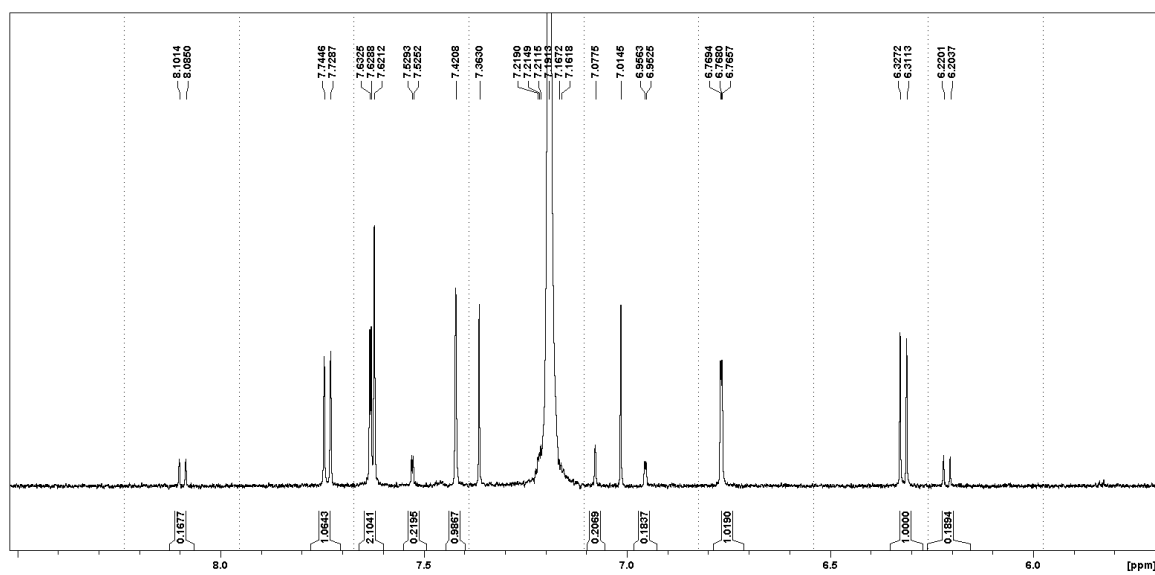

S2 <sup>1</sup>H NMR Aromatic region of petroleum ether extract of fig latex supernatant showing at least two aromatic components, suggested asferrulic, caffeic or chlorogenic acids.

### Supporting information 3 (S3)

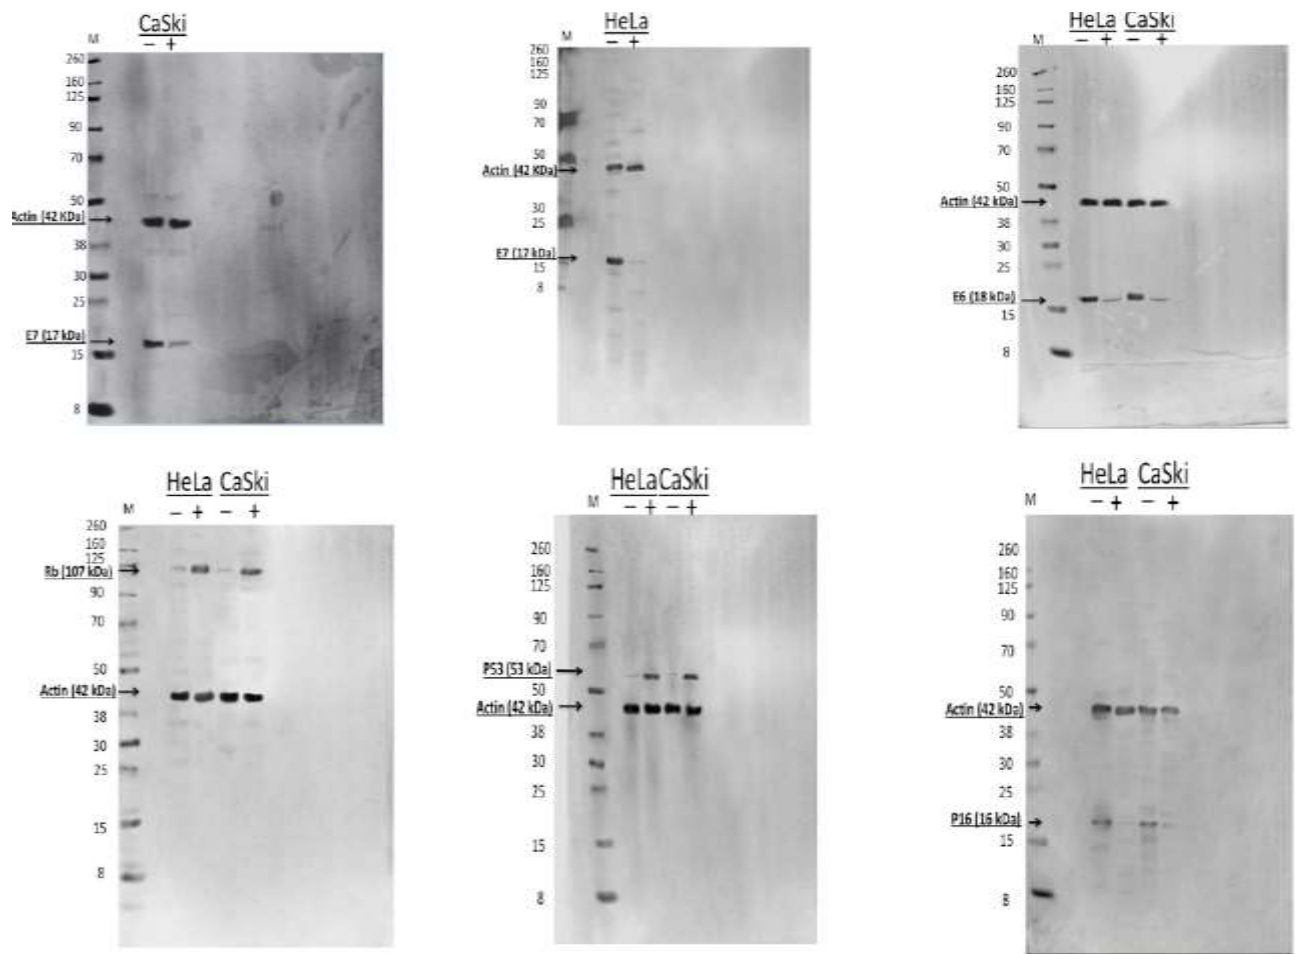

S3. Full unprocessed original scanned gels for western blots shown in figures 8.

M= Molecular weight marker

- = untreated

+ = Treated with Fig latex

#### Supporting information 4 (S4)

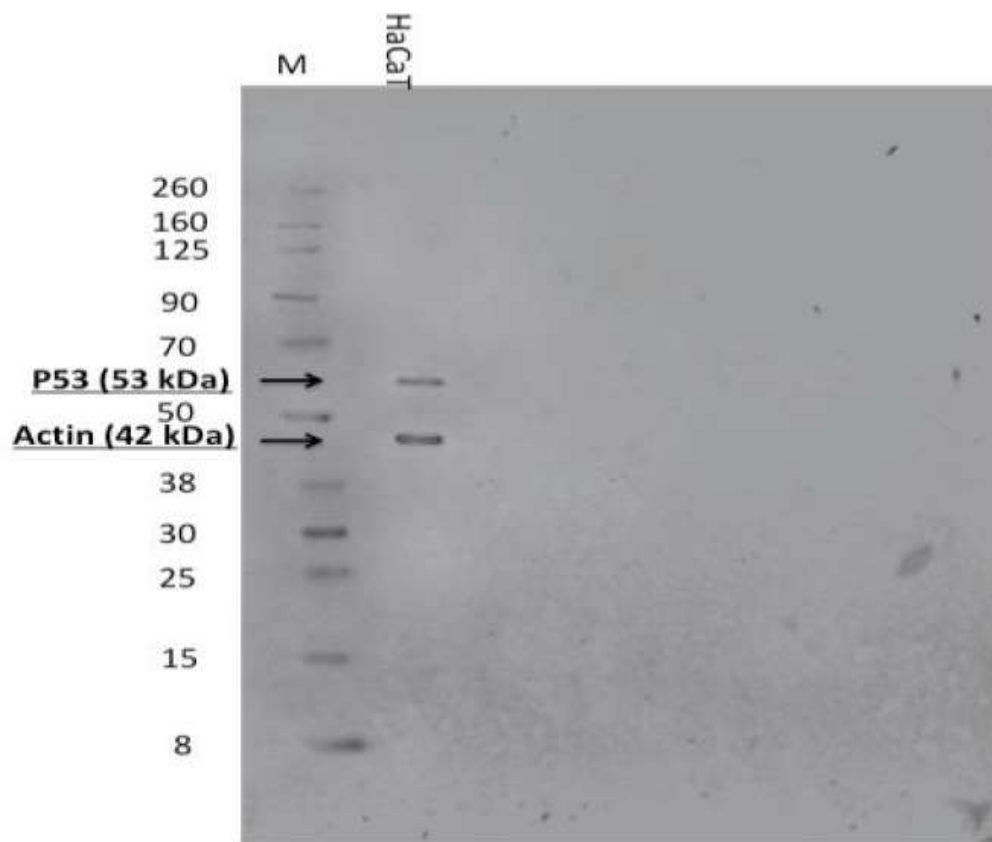

S4. Expression of p53 in HaCaT cells

Full unprocessed western blot.

M=Molecular weight marker
